# Supplementary material for: An RGD modified water-soluble fluorophore probe for in vivo NIR-II imaging of thrombosis
Source: Royal Society of Chemistry journal article supplement (doi:10.1039/d0bm00729c), 2020-01-01
Supplement: d0bm00729c1.pdf [file d0bm00729c1.pdf]

## **RGD modified water-soluble fluorophore probe for *in vivo* NIR-II imaging of thrombosis**

Yanping Wu,<sup>‡a</sup> Chao Wang,<sup>‡b</sup> Jiaqi Guo,<sup>a</sup> Abdlay Carvalho,<sup>a</sup> Yuyu Yao,<sup>\*a</sup> Pengfei Sun<sup>\*b</sup> and Quli Fan<sup>b</sup>

a. Department of Cardiology, Zhongda Hospital, Medical School of Southeast University, 87 Dingjiaqiao, Nanjing, Jiangsu, 210009, China. E-mail: yaoyuyunj@hotmail.com

b. Key Laboratory for Organic Electronics and Information Displays and Institute of Advanced Materials, Nanjing University of Posts and Telecommunications, Nanjing 210023, China. E-mail: [iampfsun@njupt.edu.cn](mailto:iampfsun@njupt.edu.cn)

<sup>‡</sup> These authors contributed equally to this work

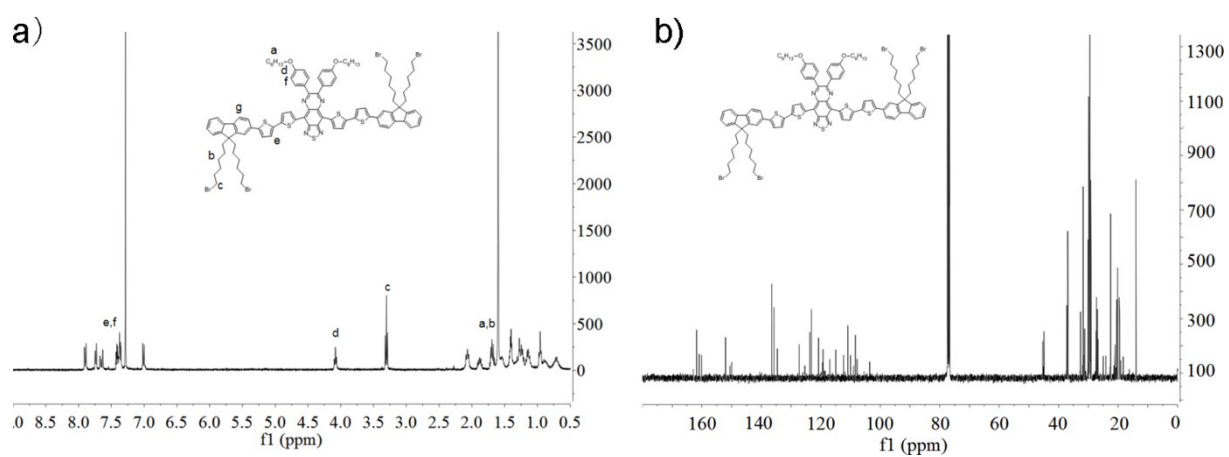

**Fig. S1.**  $^1\text{H}$  NMR spectrum (a) and  $^{13}\text{C}$  NMR spectrum (b) of TTQ-TF-Br in  $\text{CDCl}_3$ .

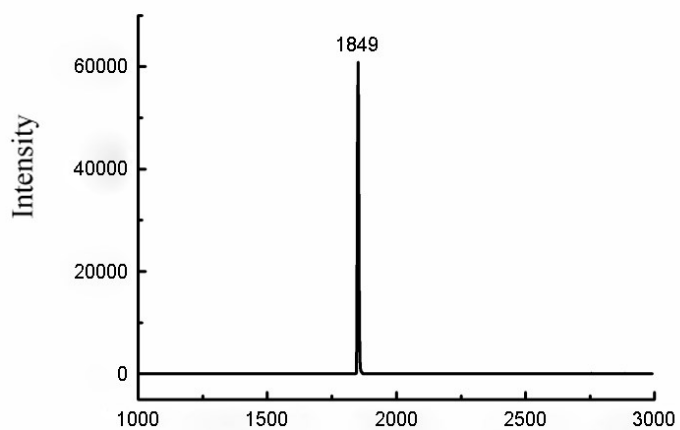

**Fig. S2.** MALDI-TOF mass spectrometry of TTQ-TF-Br.

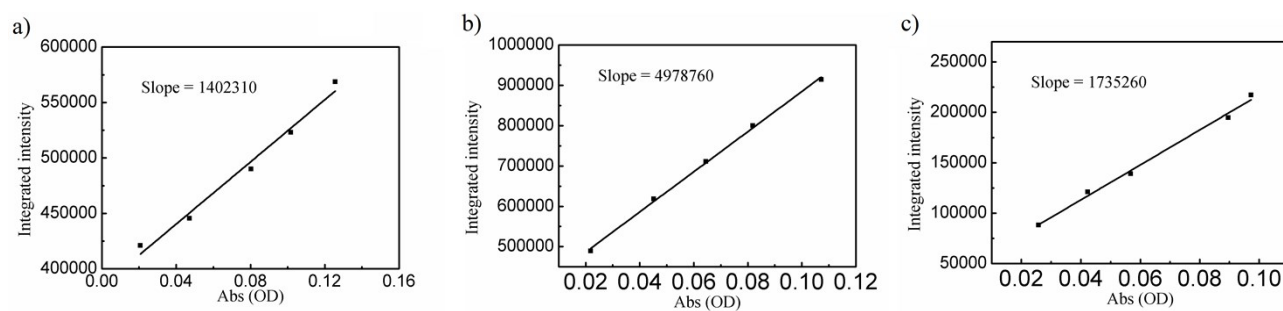

**Fig. S3.** Quantum yield measurement of TTQ-TF-Br and TTQ-PEG-c(RGD) with IR 1061 as the reference sample. The slope of (a) IR1061 in DCM, (b) TTQ-TF-Br and (c) TTQ-PEG-c(RGD) in water.

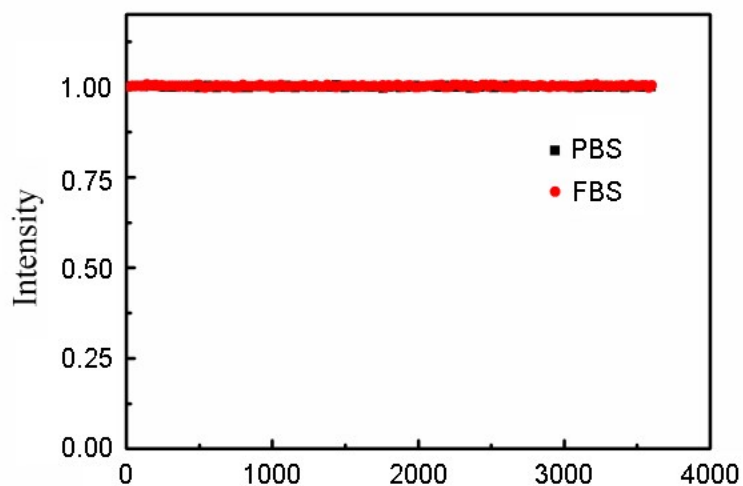

**Fig. S4.** The photostability of TTQ-PEG-c(RGD) under PBS and FBS.
